# Supplementary material
Source: PubMed Central journal article supplement (PMC6058799)
Supplement: 2017_180927-Disclosures_and_Contributions.pdf [file 2017_180927-Disclosures_and_Contributions.pdf]

Haematologica  
HAEMATOL/2017/180927  
Version 4

A novel variant Glanzmann thrombasthenia due to co-inheritance of a loss- and a gain-of-function mutation of ITGB3: evidence of a dominant effect of gain-of-function mutations

Loredana Bury, Eva Zetterberg, Eva B. Leinoe, Emanuela Falcinelli,  
Alessandro Marturano, Giorgia Manni, Alan T. Nurden, and Paolo  
Gresele

Disclosures: The authors declare no conflicts of interest

Contributions: LB, AM, EF and GM performed the experiments, analyzed and interpreted data; PG designed and supervised the study; EZ and EBL contributed the patients and performed platelet function studies; LB wrote the manuscript; PG, EZ and ATN critically revised the manuscript.
